# Supplementary material
Source: Springer Nature journal article supplement (https://www.springermedizin.de/resource/supplementary/13052_2013_347_MOESM3_ESM.docx/9671932)
Supplement: MOESM3 [file 9671932]

**Figure (1-C):**

Serum iron level among studied subjects
